# Supplementary material for: Topography and motion of acid-sensing ion channel intracellular domains
Source: eLife. 2021 Jul 22;10:e68955. doi: 10.7554/eLife.68955 (PMC8341984; doi:10.7554/eLife.68955)
Supplement: Source data 1. [file elife-68955-data1.xlsx]

## Sheet: Figure 1
Figure 1C	DPA quenching curves for Lck-CFP and Lck-YFP
		Lck-CFP		Lck-YFP
	Voltage (mV)	Mean	SEM	Mean	SEM
	-180	1.33082	0.02357	1.09836	0.00436
	-150	1.30053	0.02203	1.09581	0.00488
	-120	1.2637	0.01921	1.08274	0.00385
	-90	1.20279	0.01548	1.06666	0.00312
	-60	1.11913	0.00954	1.03937	0.00329
	-30	1.03354	0.0029	1.00856	0.00141
	0	0.97025	0.00188	0.98661	0.0012
	30	0.93298	0.00459	0.97132	0.00215
	60	0.91324	0.00537	0.95887	0.00366
	90	0.9058	0.00509	0.95318	0.00599
	120	0.90525	0.00557	0.94957	0.00661
Figure 1D	ΔF/F-15mV values for Lck-CFP and Lck-YFP
	Lck-CFP	Lck-YFP
	0.34203	0.20059
	0.48124	0.12348
	0.47431	0.17278
	0.47535	0.14384
	0.50886	0.18075
	0.40196	0.13204

## Sheet: Figure 2
Figure 2C	DPA quenching curves for CFP and YFP-tagged cASIC1 constructs
		N-CFP		C1-CFP		C2-CFP		C3-CFP		C4-CFP			N-YFP		C1-YFP		C2-YFP		C3-YFP		C4-YFP
	Voltage (mV)	Mean	SEM	Mean	SEM	Mean	SEM	Mean	SEM	Mean	SEM		Mean	SEM	Mean	SEM	Mean	SEM	Mean	SEM	Mean	SEM
	-180	1.32116	0.02248	1.44506	0.02475	1.32133	0.02349	1.22632	0.01795	1.1236	0.019		1.15658	0.01134	1.11365	0.00954	1.09495	0.00598	1.08986	0.00821	1.06642	0.00343
	-150	1.29093	0.01977	1.40663	0.02151	1.29146	0.0223	1.20622	0.01661	1.11058	0.01603		1.1435	0.01007	1.1056	0.00526	1.09501	0.00521	1.08378	0.0084	1.06061	0.00393
	-120	1.24965	0.01672	1.35292	0.0171	1.25676	0.01994	1.18056	0.01505	1.09788	0.01319		1.12222	0.00759	1.09587	0.00345	1.08568	0.0065	1.07577	0.00691	1.05478	0.00262
	-90	1.18571	0.013	1.26916	0.0123	1.19925	0.01589	1.14087	0.01258	1.07594	0.00955		1.09429	0.00533	1.07362	0.0065	1.06721	0.0071	1.05995	0.00385	1.04024	0.00523
	-60	1.10556	0.00772	1.15557	0.00709	1.11981	0.00977	1.08534	0.00767	1.04515	0.00532		1.05531	0.00329	1.04608	0.00268	1.03841	0.00385	1.03807	0.00396	1.02057	0.00306
	-30	1.02956	0.00232	1.04514	0.00271	1.03615	0.00337	1.02434	0.00211	1.01232	0.00143		1.01733	0.00165	1.01245	0.00491	1.01015	0.00269	1.00923	0.00208	1.0057	0.00265
	0	0.9716	0.00167	0.95947	0.00262	0.96561	0.00294	0.97364	0.0021	0.98419	0.00103		0.98096	0.00138	0.9787	0.00311	0.98395	0.00268	0.98523	0.00102	0.99228	0.00403
	30	0.93053	0.00517	0.90259	0.00645	0.91043	0.01013	0.93547	0.00504	0.96317	0.00288		0.96073	0.00307	0.95746	0.00401	0.96327	0.0041	0.96842	0.00275	0.97168	0.00246
	60	0.90494	0.0076	0.86671	0.01043	0.87729	0.01424	0.9072	0.00728	0.94831	0.00418		0.94368	0.00648	0.92847	0.00443	0.94816	0.00418	0.94601	0.00175	0.96399	0.00307
	90	0.88961	0.00971	0.84419	0.0124	0.85751	0.01811	0.88649	0.00918	0.93879	0.0042		0.92889	0.00544	0.92108	0.00627	0.93065	0.00741	0.93256	0.00348	0.95658	0.00373
	120	0.88272	0.01079	0.83542	0.01368	0.84632	0.02042	0.87552	0.0102	0.93443	0.00554		0.927	0.01132	0.9058	0.008	0.92581	0.00548	0.92732	0.00414	0.95006	0.00552
Figure 2D	ΔF/F-15mV values for CFP and YFP-tagged cASIC1 constructs
	CFP						YFP
	N	C1	C2	C3	C4		N	C1	C2	C3	C4
	0.54737	0.6936	0.56285	0.37119	0.1777		0.36224	0.24477	0.18369	0.23848	0.11405
	0.34249	0.636	0.52573	0.37101	0.12989		0.30171	0.2348	0.16564	0.17761	0.13016
	0.45405	0.574	0.31749	0.28103	0.28406		0.32267	0.23061	0.23252	0.1584	0.15676
	0.50933	0.6862	0.37877	0.36764	0.23368		0.20559	0.25131	0.18873	0.20095	0.1791
	0.47074	0.5829	0.65175	0.44161	0.20465		0.23267	0.19755	0.16898	0.14997	0.12661
	0.55207	0.754	0.60628	0.48769			0.19672	0.23233
			0.55476				0.21604

## Sheet: Figure 2-figure supplement 2
figure supplement 2B	Recovery time course for FP-tagged cASIC1 constructs
		N		C1		C2		C3		C4		CFP-cA1-YFP		WT
	Interpulse interval (ms)	Mean	SEM	Mean	SEM	Mean	SEM	Mean	SEM	Mean	SEM	Mean	SEM	Mean	SEM
	10	0.00702	0.0031	0.01088	0.00342	0.00557	0.00235	0.00938	0.00134	0.00878	0.00154	0.01	0.00303	0.02368	0.01179
	30	0.01499	0.00312	0.02317	0.00604	0.01522	0.0015	0.022	0.0016	0.01739	0.0027	0.01714	0.00454	0.02182	0.00332
	100	0.07496	0.00671	0.09921	0.01039	0.08135	0.00278	0.10384	0.00528	0.0892	0.01358	0.09468	0.00946	0.10097	0.0189
	200	0.16817	0.00924	0.21141	0.0153	0.18342	0.0062	0.21147	0.01429	0.18955	0.02408	0.21115	0.01583	0.2074	0.03249
	300	0.25462	0.01444	0.31138	0.01838	0.26586	0.01124	0.3021	0.01719	0.27485	0.02609	0.30551	0.01846	0.28998	0.0427
	500	0.39833	0.01887	0.47049	0.02512	0.41578	0.01298	0.44608	0.02046	0.41227	0.02669	0.45134	0.01815	0.4294	0.04729
	700	0.51688	0.01499	0.59777	0.0267	0.52933	0.01186	0.55351	0.0227	0.52659	0.02657	0.55843	0.01789	0.53961	0.05181
	1000	0.64357	0.01683	0.72124	0.02365	0.65559	0.01008	0.66	0.01972	0.6464	0.02279	0.68517	0.01229	0.64566	0.05069
	1500	0.7848	0.01339	0.83654	0.02028	0.79746	0.01012	0.80542	0.01606	0.78065	0.01826	0.81261	0.00677	0.79016	0.0412
	2000	0.86866	0.00979	0.90661	0.01535	0.88181	0.00659	0.87484	0.0112	0.862	0.0132	0.88343	0.00701	0.88492	0.03521
	3000	0.94044	0.00748	1.00465	0.02699	0.95709	0.00432	0.955	0.00677	0.94479	0.00858	0.9614	0.00525	0.96859	0.03275
	10000	0.99143	0.00902	0.99876	0.00302	0.99818	0.00134	1.00166	0.00347	1.00352	0.00248	0.9844	0.01093	0.99285	0.00711
figure supplement 2C	Desensitization time constants for FP-tagged cASIC1 constructs
	Units are ms
	WT	N	C1	C2	C3	C4	CFP-cA1-YFP
	135.482	179.292	188.923	153.237	176.68	106.013	124.16
	127.77	126.422	136.687	117.233	129.606	76.7724	129.815
	167.848	161.529	196.917	116.969	96.4619	82.0748	114.792
	111.582	195.517	112.239	109.441	121.457	70.1439	117.649
	130.016	125.648	118.94	133.94	131.844	79.3702	146.586
	154.9	96.2199	158.564	124.172	175.455	71.1018	107.571
	117.378	105.745	168.105	115.29	103.156	96.9205	103.658
	134.178	117.865	120.905	137.889	100.565	81.2328	94.6292
	128.2	99.488	183.997	116.984		97.866	100.441
		95.1447	119.952			112.81
						73.6718
						69.8944
figure supplement 2D	Recovery time constants for FP-tagged cASIC1 constructs
	Units are ms
	WT	N	C1	C2	C3	C4	CFP-cA1-YFP
	1123.55	1067.98	532.017	892.725	979.299	1054.01	1090.41
	555.317	1110.63	715.759	999.936	925.763	1058.84	840.585
	860.684	1014.84	953.974	949.75	1019.71	1202.1	838.367
	1200.27	832.643	963.66	931.569	876.843	1162.04	959.429
	1110.64	993.333	1052.76	879.704	1132.79	1017.89	784.035
	1175.17	768.889	536.686	970.795	1004.8	965.488	824.375
	1107.54	880.583	789.872	851.879	901.829	929.205	770.809
	1151.97	933.85	769.492	794.754	864.995	839.402	830.039
	1282.09	864.002	543.343	791.021		849.565	1006.6
		813.536	814.214			1112.07
						805.574
						853.876

## Sheet: Figure 2-figure supplement 4
figure supplement 4	DPA quenching of CFP or YFP insertions at cASIC1 intracellular domains without Boltzmann's fits
	(F-180mV - F+120mV)/F-15mV values for CFP and YFP-tagged cASIC1 constructs
	CFP						YFP
	N	C1	C2	C3	C4		N	C1	C2	C3	C4
	0.50471	0.64084	0.5064	0.32418	0.16423		0.26775	0.19768	0.17858	0.19211	0.10868
	0.31299	0.60128	0.47747	0.33772	0.12293		0.26443	0.20866	0.14862	0.15955	0.11367
	0.41213	0.52949	0.30328	0.25503	0.25966		0.2922	0.2241	0.20356	0.14257	0.09729
	0.46725	0.64353	0.35198	0.33295	0.2133		0.18174	0.22641	0.17213	0.18222	0.14548
	0.4338	0.54715	0.6037	0.40742	0.18572		0.20723	0.17565	0.14279	0.13625	0.11668
	0.49977	0.69557	0.56139	0.44751			0.18767	0.2146
			0.52081				0.20601

## Sheet: Figure 2-figure supplement 5
figure supplement 5B	Predicted quenching curves for CFP and YFP at depolarized or hyperpolarized voltages									figure supplement 5C	ΔF/Fnorm as a function of distance				figure supplement 5D	observed quenching ΔF/Fnorm for each FP insertion
		CFP				YFP											CFP		YFP
	Axial distance (Å)	depolarized	hyperpolarized	∆F		depolarized	hyperpolarized	∆F			Axial distance (Å)	CFP	YFP			Insertion position	Mean	SEM	Mean	SEM
	1	0.35031	0.44714	0.09683		0.5312	0.67491	0.14371			1	0.14372	0.27055			N	0.47934	0.03176	0.26252	0.02475
	2	0.35044	0.45596	0.10552		0.53141	0.68713	0.15572			2	0.15572	0.29304			C1	0.65445	0.02851	0.23189	0.0076
	3	0.35086	0.46525	0.11439		0.53203	0.69971	0.16768			3	0.16768	0.31517			C2	0.51395	0.04592	0.18791	0.01196
	4	0.35155	0.47501	0.12346		0.53308	0.7126	0.17952			4	0.17952	0.33677			C3	0.3867	0.029	0.18508	0.01597
	5	0.35251	0.48524	0.13273		0.53455	0.72572	0.19117			5	0.19118	0.35764			C4	0.206	0.02594	0.14134	0.01173
	6	0.35376	0.49595	0.14219		0.53644	0.73899	0.20255			6	0.20255	0.37758
	7	0.35529	0.50713	0.15184		0.53876	0.75231	0.21355			7	0.21355	0.39637
	8	0.35711	0.51877	0.16166		0.54152	0.76559	0.22407			8	0.22408	0.41379
	9	0.35922	0.53084	0.17162		0.54472	0.77875	0.23403			9	0.23403	0.42963
	10	0.36163	0.54333	0.1817		0.54836	0.79167	0.24331			10	0.24331	0.4437
	11	0.36434	0.55621	0.19187		0.55247	0.80429	0.25182			11	0.25182	0.45581
	12	0.36735	0.56944	0.20209		0.55704	0.81653	0.25949			12	0.25948	0.46582
	13	0.37068	0.58298	0.2123		0.56209	0.82831	0.26622			13	0.26622	0.47363
	14	0.37434	0.59679	0.22245		0.56763	0.8396	0.27197			14	0.27197	0.47914
	15	0.37833	0.61081	0.23248		0.57366	0.85035	0.27669			15	0.27669	0.48231
	16	0.38266	0.62498	0.24232		0.58021	0.86053	0.28032			16	0.28032	0.48314
	17	0.38734	0.63924	0.2519		0.58727	0.87013	0.28286			17	0.28286	0.48166
	18	0.39238	0.65354	0.26116		0.59487	0.87916	0.28429			18	0.28429	0.47791
	19	0.3978	0.66779	0.26999		0.603	0.8876	0.2846			19	0.2846	0.47198
	20	0.4036	0.68195	0.27835		0.61167	0.89548	0.28381			20	0.28381	0.46398
	21	0.40979	0.69594	0.28615		0.6209	0.90282	0.28192			21	0.28192	0.45405
	22	0.4164	0.70972	0.29332		0.63067	0.90963	0.27896			22	0.27897	0.44234
	23	0.42343	0.72322	0.29979		0.64097	0.91596	0.27499			23	0.27499	0.42901
	24	0.43088	0.7364	0.30552		0.6518	0.92181	0.27001			24	0.27001	0.41426
	25	0.43878	0.74921	0.31043		0.66312	0.92723	0.26411			25	0.2641	0.39827
	26	0.44714	0.76163	0.31449		0.67491	0.93223	0.25732			26	0.25732	0.38126
	27	0.45596	0.77363	0.31767		0.68713	0.93686	0.24973			27	0.24973	0.36344
	28	0.46525	0.78517	0.31992		0.69971	0.94113	0.24142			28	0.24142	0.34503
	29	0.47501	0.79625	0.32124		0.7126	0.94508	0.23248			29	0.23248	0.32623
	30	0.48524	0.80686	0.32162		0.72572	0.94873	0.22301			30	0.223	0.30728
	31	0.49595	0.81699	0.32104		0.73899	0.95209	0.2131			31	0.2131	0.28837
	32	0.50713	0.82664	0.31951		0.75231	0.95521	0.2029			32	0.2029	0.2697
	33	0.51877	0.83582	0.31705		0.76559	0.95808	0.19249			33	0.19249	0.25143
	34	0.53084	0.84454	0.3137		0.77875	0.96074	0.18199			34	0.182	0.23371
	35	0.54333	0.85281	0.30948		0.79167	0.96321	0.17154			35	0.17154	0.21668
	36	0.55621	0.86063	0.30442		0.80429	0.96549	0.1612			36	0.1612	0.20042
	37	0.56944	0.86804	0.2986		0.81653	0.9676	0.15107			37	0.15108	0.18502
	38	0.58298	0.87503	0.29205		0.82831	0.96956	0.14125			38	0.14125	0.17053
	39	0.59679	0.88163	0.28484		0.8396	0.97138	0.13178			39	0.13178	0.15696
	40	0.61081	0.88787	0.27706		0.85035	0.97307	0.12272			40	0.12272	0.14432
	41	0.62498	0.89374	0.26876		0.86053	0.97464	0.11411			41	0.11411	0.1326
	42	0.63924	0.89928	0.26004		0.87013	0.9761	0.10597			42	0.10596	0.12178
	43	0.65354	0.9045	0.25096		0.87916	0.97745	0.09829			43	0.0983	0.11181
	44	0.66779	0.90942	0.24163		0.8876	0.97872	0.09112			44	0.09112	0.10266
	45	0.68195	0.91406	0.23211		0.89548	0.9799	0.08442			45	0.08442	0.09427
	46	0.69594	0.91843	0.22249		0.90282	0.981	0.07818			46	0.07818	0.0866
	47	0.70972	0.92254	0.21282		0.90963	0.98203	0.0724			47	0.07239	0.07958
	48	0.72322	0.92642	0.2032		0.91596	0.98299	0.06703			48	0.06703	0.07318
	49	0.7364	0.93007	0.19367		0.92181	0.98388	0.06207			49	0.06207	0.06734
	50	0.74921	0.93351	0.1843		0.92723	0.98472	0.05749			50	0.0575	0.06201
	51	0.76163	0.93676	0.17513		0.93223	0.98551	0.05328			51	0.05328	0.05715
	52	0.77363	0.93982	0.16619		0.93686	0.98625	0.04939			52	0.04939	0.05272
	53	0.78517	0.94271	0.15754		0.94113	0.98694	0.04581			53	0.04581	0.04867
	54	0.79625	0.94543	0.14918		0.94508	0.98759	0.04251			54	0.04251	0.04498
	55	0.80686	0.948	0.14114		0.94873	0.9882	0.03947			55	0.03947	0.0416
	56	0.81699	0.95043	0.13344		0.95209	0.98877	0.03668			56	0.03668	0.03852
	57	0.82664	0.95272	0.12608		0.95521	0.98931	0.0341			57	0.0341	0.0357
	58	0.83582	0.95489	0.11907		0.95808	0.98982	0.03174			58	0.03173	0.03312
	59	0.84454	0.95693	0.11239		0.96074	0.99029	0.02955			59	0.02955	0.03075
	60	0.85281	0.95887	0.10606		0.96321	0.99074	0.02753			60	0.02753	0.02859
	61	0.86063	0.9607	0.10007		0.96549	0.99117	0.02568			61	0.02568	0.0266
	62	0.86804	0.96244	0.0944		0.9676	0.99157	0.02397			62	0.02397	0.02477
	63	0.87503	0.96408	0.08905		0.96956	0.99195	0.02239			63	0.02238	0.02309
	64	0.88163	0.96564	0.08401		0.97138	0.9923	0.02092			64	0.02092	0.02154
	65	0.88787	0.96711	0.07924		0.97307	0.99264	0.01957			65	0.01957	0.02011
	66	0.89374	0.96851	0.07477		0.97464	0.99296	0.01832			66	0.01832	0.0188
	67	0.89928	0.96983	0.07055		0.9761	0.99326	0.01716			67	0.01717	0.01759
	68	0.9045	0.97109	0.06659		0.97745	0.99355	0.0161			68	0.0161	0.01647
	69	0.90942	0.97228	0.06286		0.97872	0.99382	0.0151			69	0.0151	0.01543
	70	0.91406	0.97342	0.05936		0.9799	0.99408	0.01418			70	0.01418	0.01447
	71	0.91843	0.9745	0.05607		0.981	0.99432	0.01332			71	0.01332	0.01358
	72	0.92254	0.97552	0.05298		0.98203	0.99455	0.01252			72	0.01253	0.01276
	73	0.92642	0.9765	0.05008		0.98299	0.99477	0.01178			73	0.01179	0.01199
	74	0.93007	0.97742	0.04735		0.98388	0.99498	0.0111			74	0.0111	0.01128
	75	0.93351	0.97831	0.0448		0.98472	0.99518	0.01046			75	0.01046	0.01062
	76	0.93676	0.97915	0.04239		0.98551	0.99537	0.00986			76	0.00986	0.01001
	77	0.93982	0.97995	0.04013		0.98625	0.99555	0.0093			77	0.00931	0.00944
	78	0.94271	0.98071	0.038		0.98694	0.99572	0.00878			78	0.00879	0.0089
	79	0.94543	0.98144	0.03601		0.98759	0.99589	0.0083			79	0.0083	0.0084
	80	0.948	0.98213	0.03413		0.9882	0.99604	0.00784			80	0.00785	0.00794
	81	0.95043	0.98279	0.03236		0.98877	0.99619	0.00742			81	0.00742	0.00751
	82	0.95272	0.98342	0.0307		0.98931	0.99633	0.00702			82	0.00702	0.0071
	83	0.95489	0.98403	0.02914		0.98982	0.99647	0.00665			83	0.00665	0.00672
	84	0.95693	0.9846	0.02767		0.99029	0.9966	0.00631			84	0.0063	0.00636
	85	0.95887	0.98516	0.02629		0.99074	0.99672	0.00598			85	0.00598	0.00603
	86	0.9607	0.98568	0.02498		0.99117	0.99684	0.00567			86	0.00567	0.00572
	87	0.96244	0.98619	0.02375		0.99157	0.99695	0.00538			87	0.00538	0.00543
	88	0.96408	0.98667	0.02259		0.99195	0.99706	0.00511			88	0.00511	0.00515
	89	0.96564	0.98713	0.02149		0.9923	0.99716	0.00486			89	0.00485	0.00489
	90	0.96711	0.98757	0.02046		0.99264	0.99726	0.00462			90	0.00461	0.00465
	91	0.96851	0.98799	0.01948		0.99296	0.99735	0.00439			91	0.00439	0.00442
	92	0.96983	0.9884	0.01857		0.99326	0.99744	0.00418			92	0.00418	0.0042
	93	0.97109	0.98879	0.0177		0.99355	0.99753	0.00398			93	0.00398	0.004
	94	0.97228	0.98916	0.01688		0.99382	0.99761	0.00379			94	0.00379	0.00381
	95	0.97342	0.98952	0.0161		0.99408	0.99769	0.00361			95	0.00361	0.00363
	96	0.9745	0.98986	0.01536		0.99432	0.99776	0.00344			96	0.00344	0.00346
	97	0.97552	0.99019	0.01467		0.99455	0.99784	0.00329			97	0.00328	0.0033
	98	0.9765	0.9905	0.014		0.99477	0.99791	0.00314			98	0.00313	0.00315
	99	0.97742	0.99081	0.01339		0.99498	0.99797	0.00299			99	0.00299	0.003
	100	0.97831	0.9911	0.01279		0.99518	0.99804	0.00286			100	0.00286	0.00287

## Sheet: Figure 3
Figure 3C	Donor lifetimes for intra-subunit FRET								Figure 3D	Donor lifetimes for inter-subunit FRET
	Units are ns									Units are ns
		CFP-cA1-YFP : cASIC1 WT								CFP-cA1-cA1	CFP-cA1-cA1 : C4-YFP				CFP-cA1-cA1 : N-YFP
	N-CFP	01:00:00	01:01:00	01:03:00	01:07:00	01:15:00	01:31:00				01:01:00	01:03:00	01:07:00	01:15:00	01:01:00	01:03:00	01:07:00	01:15:00
	4.097	2.631	2.588	3.244	3.167	3.184	3.034			3.935	3.818	3.458	3.893	2.902	3.354	2.579	2.715	2.262
	3.877	2.613	2.993	2.948	2.934	3.055	2.956			3.987	4.002	3.711	2.544	3.355	3.657	3.187	2.636	2.044
	4.167	2.133	2.97	3.273	2.775	2.905	2.827			4.005	3.868	3.205	3.063	3.707	2.72	2.7	2.972	2.456
	4.043	2.439	2.959	3.443	3.418	2.687	3.136			3.586	3.682	3.396	3.274	2.657	3.091	3.104	2.808	2.445
	3.89	2.607	2.523	2.97	3.091	3.286	2.769			4.031	4.015	3.344	3.023	3.362	2.839	2.736	2.996	2.181
	4.263	2.351	2.637	2.995	2.922	2.846	3.13			3.999	4.149	3.653	3.115	2.712	3.777	2.608	3.374	2.52
	4.016	2.23	2.666	3.143	3.033	3.05	2.905			3.996	4.001	3.039	2.637	3.169	3.103	3.332	2.504	2.399
	4.085	2.357	2.685	3.161	3.022	3.488	3.155			3.994	3.841	3.598	3.427	3.275	3.473	2.705	2.854	2.854
	4.082	2.388	2.957	3.58	2.595	2.98	3.164			3.968	3.696	3.113	3.102	2.678	3.314	2.91	2.585	2.321
	4.197	2.871	2.708	2.534	3.202	2.762	2.905			4.081	3.615	3.451	3.45	3.08	3.607	2.946	2.551	2.297
	4.093	2.402	3.068	3.051	3.399	3.148	3.391			3.835	3.794	3.208	3.857	3.478	3.727	2.39	2.748	2.34
	4.137	2.555	2.707	2.974	3.041	3.538	3.06			3.955	3.968	3.866	3.798	3.347	3.073	2.877	2.816	2.499
	4.116	2.472	3.218	2.799	3.005	3.369	3.181			4.07	4.103	3.874	3.802	3.01	3.532	2.798	2.702	2.789
	4.097	2.688	2.535	3.423	3.051	2.795	2.991			4.015	3.909	3.704	3.744	2.793	3.353	3.076	2.373	2.468
	4.113	2.84	2.9	2.864	3.035	2.783	2.913			4.128	3.733	3.66	2.802	3.325	3.103	2.783	2.479	3.296
	4.027	2.441	2.707	2.938	3.201	3.01	2.935			3.762	3.893	4.125	3.272	2.896	3.668	2.9	3.217	2.279
	4.165	2.292	3.035	3.038	3.345	2.883	3.106			3.864	3.764	3.98	3.468	3.18	3.222	2.861	3.166	2.477
	4.025	2.463	2.639	3.09	3.199	3.741	2.857			3.791	3.968	3.88	3.464	3.161	3.844	3.162	2.632	2.555
	3.91	2.788	2.882	3.251	2.843	3.047	3.283			3.982	4.005	4.099	3.134	2.567	3.499	3.26	2.598	2.122
	3.913	2.497	2.857	2.804	3.036	3.546	3.171			3.9	3.882	3.896	3.361	3.474	3.215	2.617	2.825	2.565
	3.93	2.506	2.648	3.242	2.886	3.028	2.847			3.698	3.708	3.964	3.303	3.064	3.257	3.035	2.326	2.24
	4.141	2.742	2.69	2.848	3.079	3.378	3.097			3.705	3.642	3.828	3.79	3.189	3.355	3.361	2.528	2.999
	3.705	2.754	2.428	2.813	3.289	3.226	3.044			3.696	3.812	3.443	3.908	2.83	3.552	3.536	2.486	2.843
	4.127	2.782	3.036	3.148	2.935	2.976	3.069			3.984	3.856	3.772	3.895	3.416	3.792	3.134	2.734	2.517
	3.945	2.861	2.726	3.343	3.221	3.307	3.108			3.852	3.838	4.028	3.894	3.565	3.408	2.941	3.51	2.949
	4.05	2.677	2.917	2.675	2.841	2.924	2.8			3.754	3.545	3.951	3.948	3.743	3.633	2.689	3.213	2.047
	3.812	2.95	3.071	2.952	3.071	3.022	3.056			3.944	3.416	3.601	3.809	3.273	3.461	2.436	2.673	2.313
	4.008	2.797	2.683	3.145	2.923	2.687	3.147			3.889	4.092	3.852	3.926	3.141	3.324	2.821	2.891	2.315
	4.035	3.131	3.063	2.859	2.915	3.227	2.984			3.856	3.621	3.839	3.792	3.214	3.626	3.01	2.798	2.51
	3.934	2.747	2.714	3.197	3.531	3.271	2.845			3.901	3.541	3.933	3.566	3.691	3.878	3.057	2.887	2.298
	4.146	3.203	2.705	2.895	3.221	3.195	2.84			3.811	3.996	3.928	3.2	3.684	3.364	2.703	2.968	2.074
	4.138	2.885	2.814	2.654	3.291	3.424	3.387			4.007	3.868	3.87	2.871	3.864	3.357	3.642	2.393	2.547
	3.941	2.618	3.127	2.928	3.367	3.182	3.209			3.955	3.508	3.845	3.798	3.841	3.751	3.053	3.211	2.26
	3.954	2.675	2.642	2.834	3.08	3.221	3.359			3.94	3.976	3.645	3.838	3.607	3.429	3.179	2.884	2.238
	4.139	2.663	3.059	3.149	3.332	3.244	3.154			3.964	3.965	3.849	3.888	3.44	3.774	3.015	3.06	2.551
	4.044	2.89	3.185	3.174	3.073	3.164	3.332			3.973		3.788	3.334	3.426	3.384	3.158	3.009	2.657
	4.118	2.73	3.191	2.929	3.039	3.19	3.252			3.553		3.924	3.209	3.2	3.555	3.116	3.065	2.411
	4.013	2.802	3.038	2.733	2.903	3.149	3.347			4.037		4.022	3.712	2.96	3.674	2.972	2.953	2.436
	4.032	2.678	2.547	3.21	3.103	2.705	3.364			3.892		3.946	3.89	3.858	3.864		2.517	2.528
	4.012	2.523	2.564	2.645	3.019	3.345	3.032			3.904		3.712	3.926	3.343	3.766		3.141	2.478
	3.824	2.587	2.688	3.397	2.666	3.588	2.861			3.906		4.141		3.82	3.65		2.746
	3.886	2.814	2.683	3.299	2.951	2.597	2.624			3.787		3.666		3.656	2.938		2.823
	3.901	2.647	2.8	2.94	2.835	3	3.077			3.517		3.562		3.23	3.674		2.677
	3.973	2.665	2.61	3.12	3.204	2.784	3.284			3.546		3.851					2.971
	4.144	3.042	3.078	3.049	3.507	2.838	2.798			3.794		3.911					2.926
	3.99	2.741	2.807	3.417	3.049	2.834	3.423			3.85		3.806
	4.279	3.05	2.874	2.862	3.237	3.315				3.631
	4.174	2.721	2.683	2.922	2.562	2.921				3.711
	4.217	2.671	2.883	2.786	3.136	3.042				3.757
	3.953	3.277	2.907	2.684	3.158					3.722
	3.997	3.024	3.004	2.971	3.16					3.58
	4.019	2.979	2.866	3.061						3.874
	4.158	2.586		2.462						3.744
	4.224	2.589		2.891						3.683
	4.174	2.498		2.827						4.145
	4.185	2.654								3.894
	4.239	2.441								3.802
	4.125	2.514								3.977
	4.112									3.791
	4.255									4.044
	4.232									3.955
	4.048									4.007
	4.211									3.606
	3.619									3.782
	4.184									4.07
	4.123									4.032
	4.005									3.702
	4.175									3.868
	4.014									3.728
	4.004									3.836
	4.196									3.488
	4.09									3.73
	4.08									3.956
	4.2									3.994
	4.319
	4.168

## Sheet: Figure 3-figure supplement 1
figure supplement 1	Donor lifetimes between CFP on cASIC and membrane tethered YFP at varying ratios
Units are ns	CFP-cA1-cA1 : WT	CFP-cA1-cA1 : WT : Lck-YFP
	01:01:00	01:01:02	01:01:06	01:01:14
	3.935	3.439	3.216	2.245
	3.987	3.319	3.435	2.31
	4.005	3.146	2.787	2.91
	3.586	2.954	2.943	2.684
	4.031	3.764	3.379	2.691
	3.999	3.293	3.098	2.74
	3.996	3.376	2.721	2.454
	3.994	3.288	2.985	2.723
	3.968	2.926	2.836	2.913
	4.081	3.531	3.225	3.245
	3.835	3.613	3.045	3.399
	3.955	3.655	3.194	2.986
	4.07	3.513	3.052	2.875
	4.015	3.376	2.732
	4.128	2.899	2.756
	3.762	3.696	3.384
	3.864	3.494	2.593
	3.791	3.152	3.106
	3.982	3.609	2.346
	3.9	3.361
	3.698	3.088
	3.705	3.749
	3.696	3.461
	3.984	3.11
	3.852
	3.754
	3.944
	3.889
	3.856
	3.901
	3.811
	4.007
	3.955
	3.94
	3.964
	3.973
	3.553
	4.037
	3.892
	3.904
	3.906
	3.787
	3.517
	3.546
	3.794
	3.85
	3.631
	3.711
	3.757
	3.722
	3.58
	3.874
	3.744
	3.683
	4.145
	3.894
	3.802
	3.977
	3.791
	4.044
	3.955
	4.007
	3.606
	3.782
	4.07
	4.032
	3.702
	3.868
	3.728
	3.836
	3.488
	3.73
	3.956
	3.994

## Sheet: Figure 4
Figure 4B	Change in fluoresence or FRET of CFP and YFP-tagged cASIC1
	Units are percent
		N CFP			C4 YFP			CFP-cA1-YFP
	Test pH	8	7	6	8	7	6	8	7	6
		-0.62372	-0.03253	-0.1318	-1.678	-2.397	-14.134	-0.862	-1.903	-1.937
		-0.25044	-0.25363	0.1975	-1.577	-2.227	-8.214	-2.197	-2.21	-5.959
		-0.29374	-0.26134	-0.14665	-2.721	-1.403	-11.898	-0.612	-3.535	-4.351
		0.39291	0.07131	-0.11185	-1.99	-1.433	-11.017	-2.413	-0.85	-5.156
		-0.40265	-0.54555	-0.59594	-1.389	-5.991	-17.071	1.235	-3.371	-4.526
								-1.625	-2.875	-6.581
								-0.186	-3.636	-3.898
								0.06778	-2.328	-4.182
Figure 4D	Change in fluoresence or FRET of GFP and RFP-tagged cASIC1
	Units are percent
		GFP-cA1			cA1-RFP			GFP-cA1-RFP
	Test pH	8	7	6	8	7	6	8	7	6
		0.19548	0.31077	-0.66327	-1.2471	-1.09152	-0.44422	-0.403	-0.644	-0.846
		-0.80433	-0.42184	0.72503	-2.22101	-1.25647	-1.45268	0.553	-0.112	1.218
		-0.35759	-0.80071	0.4006	-0.53583	-1.88093	-0.4939	0.29	-1.009	-1.405
		-0.4784	-0.16939	-1.0086	-1.89228	-1.80409	-1.61758	1.148	-1.837	1.336
		-0.3876	-0.60957	-0.84204	-0.56762	-0.59752	-0.57229	0.281	-2.928	-0.864

## Sheet: Figure 4-figure supplement 1
figure supplement 1A	Acceptor/Donor ratios
	GFP-cA1	GFP-cA1-RFP	GFP-cA1-C1-RFP	+wild type (1:2)
	0.16618	0.33399	0.47897	0.31655
	0.12241	0.5052	0.4754	0.34042
	0.14512	0.30633	0.46735	0.31843
	0.12039	0.28479		0.28103
	0.12929	0.50374		0.34489
	0.14872	0.48941
		0.4768
figure supplement 1B	GFP-cA1-C1-RFP FRET
Units are percent		GFP-cA1-C1-RFP			+wild type (1:2)
	Test pH	8	7	6	8	7	6
		-3.51957	-3.01913	1.6665	-4.34489	1.21659	2.74253
		0.53014	-0.51987	-1.15664	0.0334	-4.46348	0.37676
		-3.39004	2.91721	-3.17353	-4.3357	-7.95942	-2.3505
					-1.18124	-2.04856	1.32995
					-0.16349	-1.69525	-5.95867

## Sheet: Figure 5
Figure 5B	DPA quenching curves for N and C1-CFP at pH 8.0 and 6.0
		N-CFP				C1-CFP
		pH 8.0		pH 6.0		pH 8.0		pH 6.0
	Voltage (mV)	Mean	SEM	Mean	SEM	Mean	SEM	Mean	SEM
	-180	1.35728	0.01494	1.3173	0.0121	1.3923	0.02339	1.37037	0.02333
	-150	1.32795	0.01354	1.29428	0.01145	1.35614	0.02169	1.3376	0.02078
	-120	1.29056	0.01198	1.25987	0.01028	1.30786	0.01866	1.29625	0.01803
	-90	1.22736	0.0086	1.21064	0.0084	1.23197	0.01487	1.22698	0.01336
	-60	1.13475	0.00469	1.12809	0.00556	1.13268	0.00911	1.13363	0.00792
	-30	1.03817	0.00173	1.0377	0.00173	1.03772	0.00308	1.03873	0.00249
	0	0.96417	0.00134	0.96517	0.00135	0.96503	0.00263	0.96387	0.00209
	30	0.91992	0.00324	0.91941	0.00334	0.9177	0.00705	0.9128	0.00603
	60	0.89378	0.00519	0.89589	0.00575	0.8882	0.01064	0.88144	0.0091
	90	0.88041	0.00685	0.88439	0.00712	0.87094	0.01315	0.86572	0.01097
	120	0.87482	0.00886	0.88036	0.00773	0.86413	0.01431	0.85913	0.01217
Figure 5C	Extents of quenching for Lck-CFP and CFP-tagged cASIC1 at pH 8 and 6
	Note: Data are paired
		Lck		N		C1		C2		C3		C4
	Test pH:	8	6	8	6	8	6	8	6	8	6	8	6
		0.34203	0.29158	0.54737	0.34744	0.6936	0.6118	0.56285	0.53483	0.37119	0.42963	0.1777	0.11505
		0.48124	0.42457	0.34249	0.30274	0.636	0.6205	0.52573	0.53883	0.37101	0.38016	0.12989	0.11163
		0.47431	0.43544	0.45405	0.37198	0.574	0.5417	0.31749	0.38888	0.28103	0.30659	0.28406	0.30361
		0.47535	0.48937	0.50933	0.46289	0.6862	0.6837	0.37877	0.44064	0.36764	0.39305	0.23368	0.25228
		0.50886	0.59021	0.47074	0.29758	0.5829	0.5766	0.65175	0.62316	0.44161	0.40826	0.20465	0.22687
		0.40196	0.36069	0.55207	0.47699	0.754	0.7129	0.60628	0.54313	0.48769	0.45038
				0.5508	0.4997	0.54627	0.52992	0.55476	0.51944
				0.5058	0.4542	0.48156	0.48619
				0.4582	0.3756	0.45427	0.41875
				0.511	0.4631	0.49064	0.47996
				0.5237	0.4684	0.35234	0.34094
				0.4816	0.4299
				0.5028	0.4851
Figure 5E	Extracellular acidification-induced motion of N CFP is readily reversible
	Note: Data are paired
	Test pH:	8	6	8
		0.54627	0.52992	0.56785
		0.48156	0.48619	0.54398
		0.45427	0.41875	0.46287
		0.49064	0.47996	0.54415
		0.35234	0.34094	0.39266

[truncated: 1 more sheets: Figure 5-figure supplement 1]
